# Supplementary material for: Enhancing Stability of High-Concentration β-Tricalcium Phosphate Suspension for Biomedical Application
Source: MDPI journal article supplement (doi:10.3390/ma16010228), 2022-12-27
Supplement: s1 [file s1]

Supporting Information for:

# Enhancing Stability of High-Concentration $\beta$ -Tricalcium Phosphate Suspension for Biomedical Application

Kai-Wen Chuang, Yi-Chen Liu, Ramachandran Balaji, Yu-Chieh Chiu, Jiashing Yu and Ying-Chih Liao \*

Department of Chemical Engineering, National Taiwan University, Taipei 10617, Taiwan

\* Correspondence: liaoy@ntu.edu.tw

## Contents:

- I. Sedimentation of  $\beta$ -TCP suspension with different dispersants
- II. Comparison of  $\beta$ -TCP suspension with and without A40
- III. Image of  $\beta$ -TCP suspension with A40 and CNC but without ball milling
- IV. TGA analysis of  $\beta$ -TCP suspension after resuspended

### I. Sedimentation of $\beta$ -TCP suspension with different dispersants

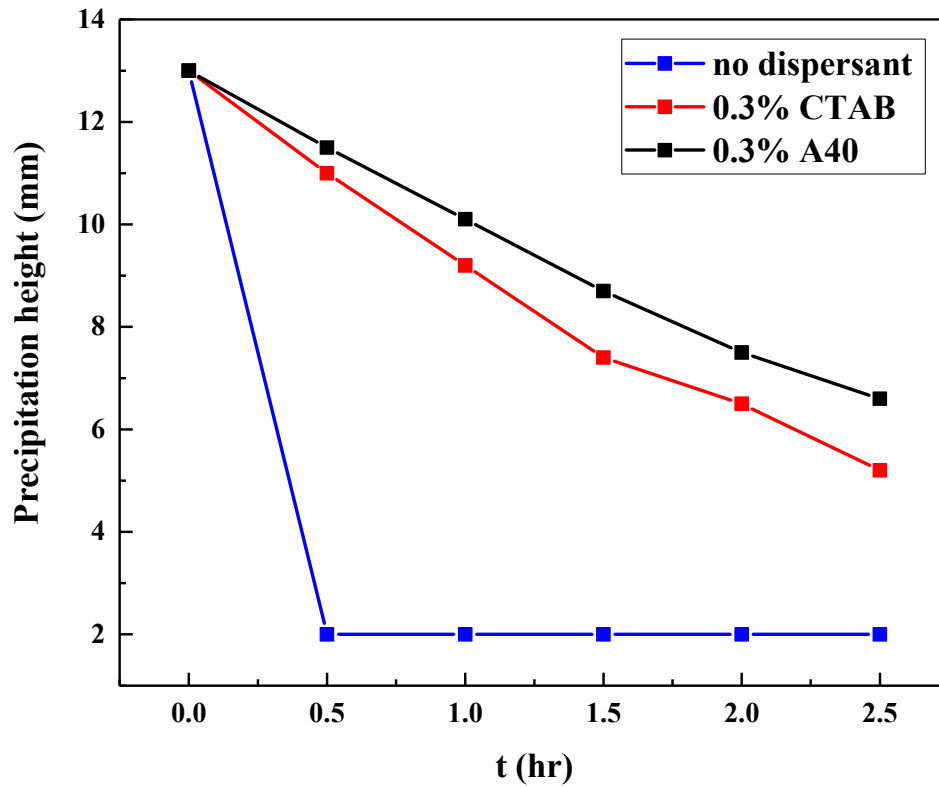

**Figure S1.** Sedimentation speed of  $\beta$ -TCP suspension with dispersants of different electronic property.

### II. Comparison of $\beta$ -TCP suspension with and without A40

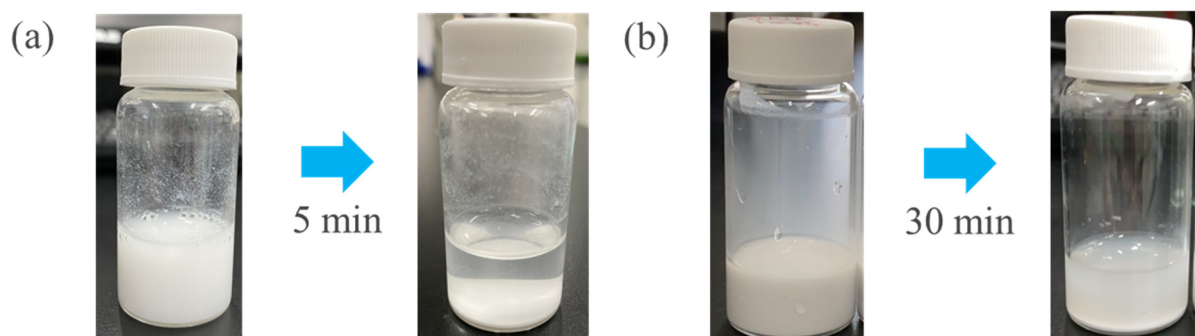

**Figure S2.** Comparison of suspension before and after adding dispersant (a) no dispersant (b) 0.3 wt% A40.

### III. Image of $\beta$ -TCP suspension with A40 and CNC but without ball milling

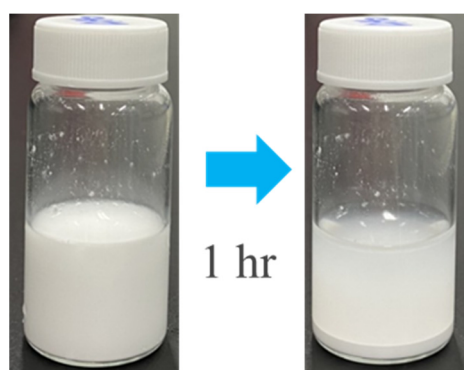

**Figure S3.**  $\beta$ -TCP suspension with 0.3 wt% A40 and 0.1% CNC without ball milling.

#### IV. TGA analysis of $\beta$ -TCP suspension after resuspended

To understand the degradation of the TCP suspension, the TGA analysis of  $\beta$ -TCP is investigated. In **Figure S4(A)**, most of the water in the suspension evaporates at 70 °C and the residual weight remains almost consistent from 100 to 700 °C. However, when the **Figure S4(A)** is magnified to **Figure S4(B)**, it shows that the residual weight decreases slightly from 100 to 500 °C. Because the TCP powder would not degrade at that temperature[40], it can be concluded that the decrease of the residual weight is due to the degradation of the dispersant (A40 and CNC).

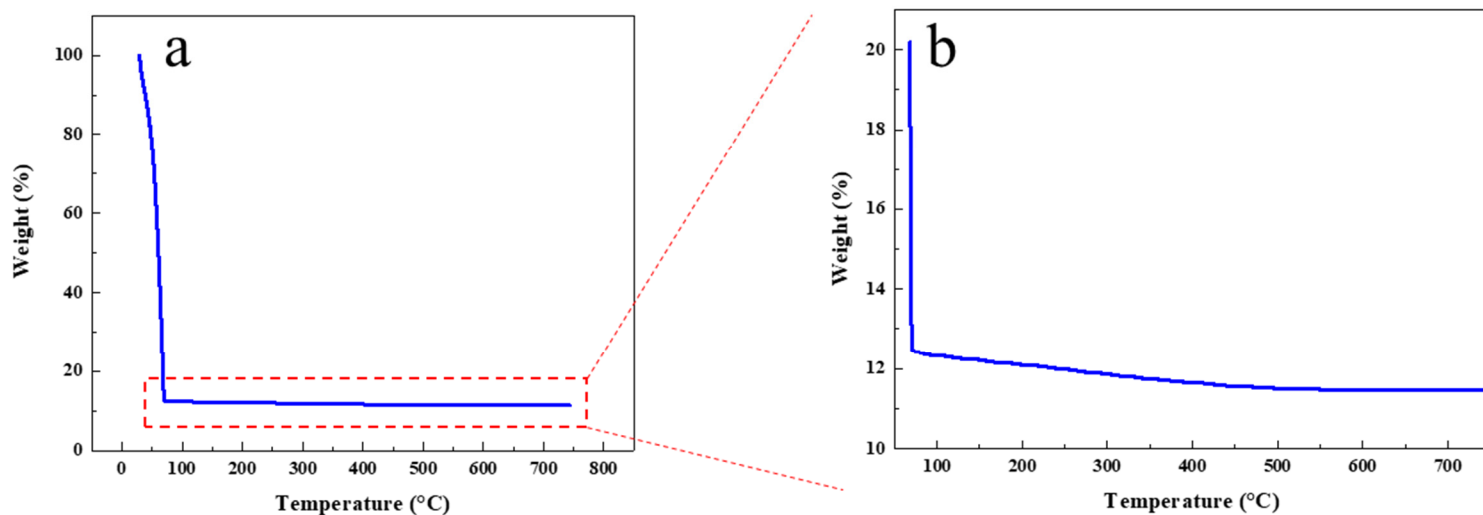

**Figure S4.** (A) TGA analysis of  $\beta$ -TCP suspension (B) magnified chart from TGA analysis.

#### Reference

40. Kumar, B. S.; Hemalatha, T.; Deepachitra, R.; Raghavan, R. N.; Prabu, P.; Sastry, T., Biphasic calcium phosphate–casein bone graft fortified with *Cassia occidentalis* for bone tissue engineering and regeneration. *Bulletin of Materials Science* **2015**, *38*, (1), 259–266.
